# Supplementary material for: A Canadian Adult Spinal Muscular Atrophy Outcome Measures Toolkit: Results of a National Consensus using a Modified Delphi Method
Source: PubMed Central journal article supplement — J Neuromuscul Dis. 2021 Jul 30;8(4):579–88. doi: 10.3233/JND-200617 (PMC8385500; doi:10.3233/jnd-200617), 2021-07-30
Supplement: jnd-8-jnd200617-s003.pdf [file jnd-8-jnd200617-s003.pdf]

## Introduction Survey Letter

Dear SMA Community,

Thank you for your responses to the preliminary survey to collect any additional measures before we began the Delphi Process.

The first round of the Delphi Process is beginning, and this survey is very important for collecting the most useful results for the group. This goal of this round is to narrow down the list of outcomes to those which are most preferred. Later rounds will examine more specific aspects of the remaining outcomes.

Please use the attached table of outcomes when completing the survey. The table includes important information and evidence to support each of the outcomes. This information should be considered when ranking outcomes. The table itself includes a link to an outcome manual or informative publication when available, evidence of validity and reliability, timing, type, whether the outcome is proprietary, and additional references for consultation.

Beyond the information provided in the table, please use your best judgement and experience when ranking the outcomes.

Round one will be open for approximately 2 weeks before analysis will begin.

Sincerely,

Jeremy Slayter  
Research Assistant  
Stan Cassidy Centre for Rehabilitation
