# Supplementary material for: A Canadian Adult Spinal Muscular Atrophy Outcome Measures Toolkit: Results of a National Consensus using a Modified Delphi Method
Source: PubMed Central journal article supplement — J Neuromuscul Dis. 2021 Jul 30;8(4):579–88. doi: 10.3233/JND-200617 (PMC8385500; doi:10.3233/jnd-200617), 2021-07-30
Supplement: jnd-8-jnd200617-s004.pdf [file jnd-8-jnd200617-s004.pdf]

**Table of Outcomes – SMA Delphi Process Round 1**

| <i>Type of Measure</i>      | <i>Outcome Measure</i>                              | <i>Age</i> | <i>Timing</i>    | <i>Scoring Type</i>         | <i>Reliability</i><br>H – High<br>(0.85+)<br>M – Moderate<br>(0.70-0.84)<br>L – Low<br>(<0.70)                            | <i>Validity</i><br>H – High<br>(0.85+)<br>M – Moderate<br>(0.70-0.84)<br>L – Low<br>(<0.70)                                                                                                      | <i>Proprietary</i>                                | <i>Other</i>                                                                                     | <i>References</i>                                                                                                                                                                                                                                                                                                                                                                                                             |
|-----------------------------|-----------------------------------------------------|------------|------------------|-----------------------------|---------------------------------------------------------------------------------------------------------------------------|--------------------------------------------------------------------------------------------------------------------------------------------------------------------------------------------------|---------------------------------------------------|--------------------------------------------------------------------------------------------------|-------------------------------------------------------------------------------------------------------------------------------------------------------------------------------------------------------------------------------------------------------------------------------------------------------------------------------------------------------------------------------------------------------------------------------|
| Functional Motor Assessment | <a href="#">Gross Motor Function Measure (GMFM)</a> | 5–18 years | 45 to 60 minutes | Total and Sub-scores        | Inter-rater: H <sup>1,2</sup><br>Intra-rater: H <sup>3</sup><br>Internal: M-H <sup>5</sup><br>Test-Retest: H <sup>2</sup> | <b>Criterion:</b><br>QMT/HHD – M<br>(0.63-0.86) <sup>4</sup><br>HFMSE – H<br>(0.98) <sup>6</sup>                                                                                                 | Yes – available with author’s written permission. | Sensitivity shown to be good against QMT <sup>4</sup><br>May need equipment.                     | <sup>1</sup> <a href="#">Iannaccone ST 2002</a><br><sup>2</sup> <a href="#">Iannaccone et al. 2003</a><br><sup>3</sup> <a href="#">O’Hagen et al. 2007</a><br><sup>4</sup> <a href="#">Nelson et al. 2006</a><br><sup>5</sup> <a href="#">Cano et al. 2013</a><br><sup>6</sup> <a href="#">Glanzman et al. 2011</a><br><a href="#">Montes et al. 2009</a><br><a href="#">Russell et al. 1989</a><br><a href="#">TREAT-NMD</a> |
| Functional Motor Assessment | <a href="#">Expanded Hammersmith Scale (HFMSE)</a>  | 2–45 years | <15 minutes      | Ordinal Scoring of 36 items | Intra-rater: H <sup>1</sup><br>Internal:M-H <sup>9</sup><br>Test-Retest: H <sup>1</sup>                                   | <b>Content:</b> H <sup>10</sup><br><b>Criterion:</b><br>GMFM – H (0.98) <sup>2</sup><br>FVC – H (0.87) <sup>2</sup><br>ULM – H <sup>5</sup><br>6MWT – M-H <sup>6,7</sup><br>TUG – M <sup>4</sup> | No                                                | Limitation for use in strong type III who can run and participate in age-appropriate activities. | <sup>1</sup> <a href="#">O’Hagen et al. 2007</a><br><sup>2</sup> <a href="#">Glanzman et al. 2011</a><br><sup>3</sup> <a href="#">Mercuri et al. 2018</a>                                                                                                                                                                                                                                                                     |

| <i>Type of Measure</i>      | <i>Outcome Measure</i>                          | <i>Age</i>        | <i>Timing</i> | <i>Scoring Type</i>                      | <i>Reliability</i><br>H – High<br>(0.85+)<br>M – Moderate<br>(0.70-0.84)<br>L – Low<br>(<0.70) | <i>Validity</i><br>H – High<br>(0.85+)<br>M – Moderate<br>(0.70-0.84)<br>L – Low<br>(<0.70) | <i>Proprietary</i> | <i>Other</i>                                                                                                                                          | <i>References</i>                                                                                                                                                                                                                                                                                                                                                                                     |
|-----------------------------|-------------------------------------------------|-------------------|---------------|------------------------------------------|------------------------------------------------------------------------------------------------|---------------------------------------------------------------------------------------------|--------------------|-------------------------------------------------------------------------------------------------------------------------------------------------------|-------------------------------------------------------------------------------------------------------------------------------------------------------------------------------------------------------------------------------------------------------------------------------------------------------------------------------------------------------------------------------------------------------|
|                             |                                                 |                   |               |                                          |                                                                                                |                                                                                             |                    | Sensitivity unknown. <sup>2</sup><br>Used in Clinical Trials for SMA and Nusinersen. <sup>3</sup><br>Combined measure of HFMS and GMFM <sup>8</sup> . | <sup>4</sup> <a href="#">Dunaway et al. 2014</a><br><sup>5</sup> <a href="#">Mazzone et al. 2011</a><br><sup>6</sup> <a href="#">Young et al. 2016</a><br><sup>7</sup> <a href="#">Montes et al. 2010</a><br><sup>8</sup> <a href="#">Berard et al. 2008</a><br><sup>9</sup> <a href="#">Cano et al. 2013</a><br><sup>10</sup> <a href="#">Pera et al. 2017</a><br><a href="#">Montes et al. 2009</a> |
| Functional Motor Assessment | <a href="#">Revised Hammersmith Scale (RHS)</a> | Children & Adults | ~15 minutes   | Scored and Timed sections (Max Score 69) | Internal: H <sup>1</sup>                                                                       | <b>Criterion:</b><br>WHO Walking Milestones – H (0.86) <sup>1</sup>                         | No                 | Combination measure of HFMSE, NSAA, CHOP INTEND, and WHO Developmental Milestones. <sup>1</sup>                                                       | <sup>1</sup> <a href="#">Ramsey et al. 2017</a>                                                                                                                                                                                                                                                                                                                                                       |

| <i>Type of Measure</i>      | <i>Outcome Measure</i>                                    | <i>Age</i>   | <i>Timing</i> | <i>Scoring Type</i>                | <i>Reliability</i><br>H – High<br>(0.85+)<br>M – Moderate<br>(0.70-0.84)<br>L – Low<br>(<0.70)                              | <i>Validity</i><br>H – High<br>(0.85+)<br>M – Moderate<br>(0.70-0.84)<br>L – Low<br>(<0.70)                          | <i>Proprietary</i> | <i>Other</i>                                                                                                                                                      | <i>References</i>                                                                                                                                                                                                                                                                                                                                    |
|-----------------------------|-----------------------------------------------------------|--------------|---------------|------------------------------------|-----------------------------------------------------------------------------------------------------------------------------|----------------------------------------------------------------------------------------------------------------------|--------------------|-------------------------------------------------------------------------------------------------------------------------------------------------------------------|------------------------------------------------------------------------------------------------------------------------------------------------------------------------------------------------------------------------------------------------------------------------------------------------------------------------------------------------------|
| Functional Motor Assessment | <a href="#">Motor Function Measure (MFM)</a>              | 2+           | ~36 Minutes   | 32 items assessed via Likert Scale | Inter-rater: M-H <sup>1,2</sup><br>Intra-rater: M-H <sup>1</sup><br>Internal: H <sup>1</sup><br>Test-Retest: H <sup>1</sup> | <b>Criterion:</b><br>FIM – H (0.91) <sup>1</sup><br>Vignos – H (0.91) <sup>1</sup><br>Brooke – H (0.85) <sup>1</sup> | No                 | Measure not specific to SMA <sup>1</sup> . Regularly recommended alongside HFMSE and GMFM. <sup>4</sup> Responsiveness was shown to be good in SMA <sup>3</sup> . | <sup>1</sup> <a href="#">Berard et al. 2008</a><br><sup>2</sup> <a href="#">Ruiz-Cortes et al. 2017</a><br><sup>3</sup> <a href="#">Vuillerot et al. 2013</a><br><sup>4</sup> <a href="#">Bertini et al. 2005</a><br><a href="#">Montes et al. 2009</a><br><a href="#">TREAT-NMD</a>                                                                 |
| Functional Motor Assessment | <a href="#">Egen Klassifikation Scale Revisited (EK2)</a> | Teens-Adults | 10 minutes    | Ordinal Scoring of 10 items        | Inter-rater: H <sup>1</sup><br>Intra-rater: H <sup>3</sup><br>Internal: M-H <sup>4</sup>                                    | <b>Content: H<sup>5</sup></b><br><b>Criterion:</b><br>FVC – M (0.77) <sup>2</sup><br>MMT – H (0.87) <sup>2</sup>     | No                 |                                                                                                                                                                   | <sup>1</sup> <a href="#">Steffensen et al. 2002</a><br><sup>2</sup> <a href="#">Steffensen et al. 2008</a><br><sup>3</sup> <a href="#">Werlauff &amp; Steffensen 2014</a><br><sup>4</sup> <a href="#">Cano et al. 2013</a><br><sup>5</sup> <a href="#">Steffensen et al. 2001</a><br><a href="#">Montes et al. 2009</a><br><a href="#">TREAT-NMD</a> |
| Functional Motor Assessment | <a href="#">Spinal Muscular Atrophy</a>                   | 2+ years     | <30 minutes   | Composite score of                 | No Information Available                                                                                                    | No Information Available                                                                                             | No                 |                                                                                                                                                                   | <sup>1</sup> <a href="#">Montes et al. 2015</a>                                                                                                                                                                                                                                                                                                      |

| <i>Type of Measure</i>             | <i>Outcome Measure</i>                                           | <i>Age</i> | <i>Timing</i> | <i>Scoring Type</i>              | <i>Reliability</i><br>H – High<br>(0.85+)<br>M – Moderate<br>(0.70-0.84)<br>L – Low<br>(<0.70) | <i>Validity</i><br>H – High<br>(0.85+)<br>M – Moderate<br>(0.70-0.84)<br>L – Low<br>(<0.70) | <i>Proprietary</i> | <i>Other</i>                                                                       | <i>References</i>                                                                                                                                                                                                                             |
|------------------------------------|------------------------------------------------------------------|------------|---------------|----------------------------------|------------------------------------------------------------------------------------------------|---------------------------------------------------------------------------------------------|--------------------|------------------------------------------------------------------------------------|-----------------------------------------------------------------------------------------------------------------------------------------------------------------------------------------------------------------------------------------------|
|                                    | <a href="#">Functional Composite Scale</a>                       |            |               | HFMSE,<br>ULM, 6MWT              |                                                                                                |                                                                                             |                    |                                                                                    |                                                                                                                                                                                                                                               |
| Functional Motor Assessment        | <a href="#">Manual Muscle Testing (MMT)</a>                      | 4+ years   | 15 Minutes    | Qualitative Scale (0-5)          | Inter-rater: H <sup>1*</sup><br>Intra-rater: H <sup>1*</sup>                                   | <b>Criterion:</b><br>TUG – M<br>(0.816) <sup>3</sup><br>EK2 – H (0.87) <sup>2</sup>         | No                 | No known studies specifically looking at Reliability & Validity in SMA population. | <sup>1</sup> <a href="#">Barr et al. 1991</a><br><sup>2</sup> <a href="#">Steffensen et al. 2008</a><br><sup>3</sup> <a href="#">Dunaway et al. 2014</a><br><a href="#">NIH NINDS CDE for SMA</a><br>*Duchennes or Beckers Muscular Dystrophy |
| <b>Functional Motor Assessment</b> | <a href="#">Canadian Occupational Performance Measure (COPM)</a> | All Ages   | Unknown       | Multi-stage Scoring & Interviews | No Information Available                                                                       | No Information Available                                                                    | Yes                | Website available with additional information.                                     | <a href="#">COPM</a>                                                                                                                                                                                                                          |
| Functional Motor Assessment        | CHOP-ATEND                                                       | ~18+       | Unknown       | Revised Edition of CHOP-INTEND   | No Information Available                                                                       | No Information Available                                                                    | Unknown            | Newly available outcome with very limited published data available.                |                                                                                                                                                                                                                                               |
|                                    | Spinal Muscular Atrophy Health Index                             | Unknown    | Unknown       | Quantitative Index               | No Information Available                                                                       | No Information Available                                                                    | Unknown            | Very little published data available.                                              |                                                                                                                                                                                                                                               |

| <i>Type of Measure</i>      | <i>Outcome Measure</i>                                  | <i>Age</i> | <i>Timing</i> | <i>Scoring Type</i>                                                                     | <i>Reliability</i><br>H – High<br>(0.85+)<br>M – Moderate<br>(0.70-0.84)<br>L – Low<br>(<0.70) | <i>Validity</i><br>H – High<br>(0.85+)<br>M – Moderate<br>(0.70-0.84)<br>L – Low<br>(<0.70) | <i>Proprietary</i> | <i>Other</i>                                                                                           | <i>References</i>                                                                                                                                                                           |
|-----------------------------|---------------------------------------------------------|------------|---------------|-----------------------------------------------------------------------------------------|------------------------------------------------------------------------------------------------|---------------------------------------------------------------------------------------------|--------------------|--------------------------------------------------------------------------------------------------------|---------------------------------------------------------------------------------------------------------------------------------------------------------------------------------------------|
| (SMA-HI)                    |                                                         |            |               |                                                                                         |                                                                                                |                                                                                             |                    |                                                                                                        |                                                                                                                                                                                             |
| Functional Motor Assessment | <a href="#">Revised Upper Limb Module for SMA</a>       | 2+         | <10 minutes   | Ordinal Scoring of 20 items                                                             | Inter-rater: H <sup>1</sup>                                                                    | <b>Content:</b> H <sup>1,2</sup><br><b>Criterion:</b> HFMS – M (0.75) <sup>3</sup>          | No                 | Revised in 2017, original ULM no longer available on website.                                          | <sup>1</sup> <a href="#">Mazzone et al. 2017</a><br><sup>2</sup> <a href="#">Pera et al. 2017</a><br><sup>3</sup> <a href="#">Mazzone et al. 2011</a><br><a href="#">Montes et al. 2009</a> |
| Functional Motor Assessment | <a href="#">North Star Ambulatory Assessment (NSAA)</a> | 2+ years   | 10-15 minutes | Ordinal Scoring of 17 items.                                                            | Inter-rater: H <sup>1</sup><br>Intra-rater: H <sup>1</sup><br>Internal: M-H <sup>2</sup>       | Not Validated in SMA                                                                        | No                 |                                                                                                        | <a href="#">TREAT-NMD</a><br><sup>1</sup> <a href="#">Mazzone et al. 2009</a><br><sup>2</sup> <a href="#">Cano et al. 2013</a>                                                              |
| Functional Motor Assessment | Motor Unit Number Estimation (MUNE)                     | 2+         | Unknown       | Electrophysiological Signal and computation to determine a Motor Unit Number Estimation | Test-retest: H <sup>1</sup>                                                                    | <b>Criterion:</b> MHFMS – L (0.63) <sup>1</sup><br>MHFMSE – M (0.73) <sup>1</sup>           | Unknown            | Requires specific equipment. Training is essential to reliable results. <sup>1</sup> Manual not found. | <sup>1</sup> <a href="#">Lewelt et al. 2010</a>                                                                                                                                             |
| Functional Motor Assessment | <a href="#">Brooke and Vignos Scales</a>                | 5+ years   | <10 minutes   | Scale of 1-6 and 1-10. Qualitative                                                      | Presently unavailable for SMA                                                                  | Presently unavailable for SMA                                                               | No                 |                                                                                                        | <a href="#">Lue et al. 2009</a>                                                                                                                                                             |

| <i>Type of Measure</i>      | <i>Outcome Measure</i>             | <i>Age</i> | <i>Timing</i> | <i>Scoring Type</i> | <i>Reliability</i><br>H – High<br>(0.85+)<br>M – Moderate<br>(0.70-0.84)<br>L – Low<br>(<0.70)           | <i>Validity</i><br>H – High<br>(0.85+)<br>M – Moderate<br>(0.70-0.84)<br>L – Low<br>(<0.70)                                                                                                       | <i>Proprietary</i> | <i>Other</i>                                                                                           | <i>References</i>                                                                                                                                                                                          |
|-----------------------------|------------------------------------|------------|---------------|---------------------|----------------------------------------------------------------------------------------------------------|---------------------------------------------------------------------------------------------------------------------------------------------------------------------------------------------------|--------------------|--------------------------------------------------------------------------------------------------------|------------------------------------------------------------------------------------------------------------------------------------------------------------------------------------------------------------|
| Functional Motor Assessment | Timed Stair Climb                  | 5+ years   | 10 minutes    | Timed Score         | Presently unavailable for SMA                                                                            | Presently unavailable for SMA                                                                                                                                                                     | No                 |                                                                                                        | <a href="#">NIH NINDS CDE for SMA</a>                                                                                                                                                                      |
| Functional Motor Assessment | <a href="#">10m Walk Test</a>      | 5+ years   | <5 minutes    | Time Recorded       | Presently unavailable for SMA                                                                            | <b>Criterion:</b><br>TUG – L-M (0.691) <sup>1</sup>                                                                                                                                               | No                 |                                                                                                        | <sup>1</sup> <a href="#">Dunaway et al. 2014 NIH NINDS CDE for SMA</a>                                                                                                                                     |
| Functional Motor Assessment | <a href="#">Timed up and Go</a>    | 5+ years   | <15 minutes   | Time Recorded       | Inter-rater: H <sup>1*</sup><br>Intra-rater: H <sup>1*</sup><br>Internal:<br>Test-Retest: H <sup>1</sup> | <b>Criterion:</b><br>10MWT – L-M (0.691) <sup>1</sup><br>6MWT – L (-0.514) <sup>1</sup><br>HFMSE – M (-0.717) <sup>1</sup><br>MMT – M (0.816) <sup>1</sup><br>HHD – L (-0.408/0.658) <sup>1</sup> | No                 |                                                                                                        | <sup>1</sup> <a href="#">Dunaway et al. 2014 NIH NINDS CDE for SMA</a><br>*Not tested in SMA                                                                                                               |
| Functional Motor Assessment | <a href="#">6-minute Walk Test</a> | 2+ years   | <15 minutes   | Distance Covered    | Test-Retest: H <sup>1,4</sup>                                                                            | <b>Criterion:</b><br>TUG – L (0.514) <sup>3</sup><br>Peak O <sub>2</sub> Uptake – L (0.558) <sup>1</sup><br>HFMSE – M (0.755) <sup>1</sup><br>MMT – L (0.691) <sup>1</sup>                        | No                 | Able to detect fatigue, whereas other measures such as 10mwt, MVIC are unable to do this. <sup>2</sup> | <sup>1</sup> <a href="#">Young et al. 2016</a><br><sup>2</sup> <a href="#">Montes et al. 2010</a><br><sup>3</sup> <a href="#">Dunaway et al. 2014</a><br><sup>4</sup> <a href="#">Takeuchi et al. 2008</a> |

| <i>Type of Measure</i>      | <i>Outcome Measure</i>                           | <i>Age</i> | <i>Timing</i>       | <i>Scoring Type</i>                     | <i>Reliability</i><br>H – High (0.85+)<br>M – Moderate (0.70-0.84)<br>L – Low (<0.70)            | <i>Validity</i><br>H – High (0.85+)<br>M – Moderate (0.70-0.84)<br>L – Low (<0.70)                       | <i>Proprietary</i> | <i>Other</i>                                                              | <i>References</i>                                                                                                                  |
|-----------------------------|--------------------------------------------------|------------|---------------------|-----------------------------------------|--------------------------------------------------------------------------------------------------|----------------------------------------------------------------------------------------------------------|--------------------|---------------------------------------------------------------------------|------------------------------------------------------------------------------------------------------------------------------------|
|                             |                                                  |            |                     |                                         |                                                                                                  | HHD – L (0.377/0.622) <sup>1</sup><br>10MWT – H (-0.937) <sup>1</sup>                                    |                    |                                                                           | <a href="#">NIH NINDS CDE for SMA</a>                                                                                              |
| Functional Motor Assessment | <a href="#">2 Minute Walk Test</a>               | 2+ years   | 2 minutes per trial | Distance Covered                        |                                                                                                  | <b>Criterion:</b><br>6MWT – H (0.99) <sup>1*</sup><br>TUG – H (                                          | No                 |                                                                           | <sup>1</sup> <a href="#">Andersen et al. 2016</a><br>*Neuromuscular Diseases, not SMA Specific                                     |
| Functional Motor Assessment | <a href="#">Jebsen Taylor Hand Function Test</a> | 6+ years   | 15-45 minutes       | Timed Sub-scores                        | Inter-rater: H <sup>1*</sup><br>Intra-rater: M-H <sup>1*</sup><br>Test-Retest: M-H <sup>1*</sup> | <b>Content:</b> L <sup>1*</sup><br><b>Criterion:</b><br>Michigan Hand Function Test – L-M. <sup>1*</sup> | Yes                | No Reliability or Validity information available for SMA population.      | <a href="#">NIH NINDS CDE for SMA</a><br><sup>1</sup> <a href="#">Shirley Ryan Ability Lab</a><br>*Population measured was not SMA |
| Functional Motor Assessment | <a href="#">Box and Blocks Test</a>              | 6+ years   | <10 minutes         | Count of Blocks transported in a minute | Presently unavailable for SMA                                                                    | Presently unavailable for SMA                                                                            | Yes                | Used broadly in other populations. No Reliability or Validity information | <a href="#">SCIRE Project</a>                                                                                                      |

| <i>Type of Measure</i>      | <i>Outcome Measure</i>                                           | <i>Age</i> | <i>Timing</i> | <i>Scoring Type</i>                   | <i>Reliability</i><br>H – High<br>(0.85+)<br>M – Moderate<br>(0.70-0.84)<br>L – Low<br>(<0.70) | <i>Validity</i><br>H – High<br>(0.85+)<br>M – Moderate<br>(0.70-0.84)<br>L – Low<br>(<0.70)                                                                                             | <i>Proprietary</i> | <i>Other</i>                                                                     | <i>References</i>                                                                               |
|-----------------------------|------------------------------------------------------------------|------------|---------------|---------------------------------------|------------------------------------------------------------------------------------------------|-----------------------------------------------------------------------------------------------------------------------------------------------------------------------------------------|--------------------|----------------------------------------------------------------------------------|-------------------------------------------------------------------------------------------------|
|                             |                                                                  |            |               |                                       |                                                                                                |                                                                                                                                                                                         |                    | available for SMA population.                                                    |                                                                                                 |
| Functional Motor Assessment | <a href="#">Purdue Pegboard</a>                                  | 6+ years   | <15 minutes   | Quantitative Data                     | Presently unavailable for SMA                                                                  | Presently unavailable for SMA                                                                                                                                                           | No                 | Evaluation of Fine Coordination & Dexterity. Equipment may need to be purchased. | <a href="#">NIH NINDS CDE for SMA Shirley Ryan Ability Lab</a>                                  |
| Functional Motor Assessment | <a href="#">Nine Hole Peg Test (9HPT)</a>                        | 4+         | Minutes       | Time taken                            | Presently unavailable for SMA                                                                  | Presently unavailable for SMA                                                                                                                                                           | Unknown            | Widely studied in other populations.                                             | <a href="#">TREAT-NMD</a>                                                                       |
| Functional Motor Assessment | <a href="#">SMA Functional Rating Scale</a>                      | Adults     | 30 minutes    | Total of 14 items - Quantitative Data | Inter-rater: M-H <sup>1</sup><br>Intra-rater: H <sup>1</sup><br>Internal: M <sup>1</sup>       | <b>Criterion:</b><br>Limb Norris Score – H (0.853) <sup>1</sup><br>ALSFRS Upper Limb – M (0.714) <sup>1</sup><br>ALSFRS Trunk – M (0.734)<br>ALSFRS Lower Limb – L (0.693) <sup>1</sup> | No                 | Evaluator administered.                                                          | <a href="#">NIH NINDS CDE for SMA</a><br><sup>1</sup> <a href="#">Hashizume et al. 2015</a>     |
| Functional Motor Assessment | <a href="#">Handheld Dynamometry/Maximum Voluntary Isolation</a> | 5+ years   | 30 Minutes    | Data recorded in lbs, N, or Kg        | Inter-rater: M-H <sup>1,3</sup><br>Intra-rater: H <sup>1</sup><br>Test-Retest: H <sup>1</sup>  | Varies depending on joint/muscles measured.                                                                                                                                             |                    | Equipment necessary                                                              | <sup>1</sup> <a href="#">Merlini et al. 2002</a><br><sup>2</sup> <a href="#">Bertini et al.</a> |



| <i>Type of Measure</i>  | <i>Outcome Measure</i>              | <i>Age</i> | <i>Timing</i>  | <i>Scoring Type</i>                        | <i>Reliability</i><br>H – High (0.85+)<br>M – Moderate (0.70-0.84)<br>L – Low (<0.70) | <i>Validity</i><br>H – High (0.85+)<br>M – Moderate (0.70-0.84)<br>L – Low (<0.70)       | <i>Proprietary</i> | <i>Other</i>                                                                                                    | <i>References</i>                                                                                                                                          |
|-------------------------|-------------------------------------|------------|----------------|--------------------------------------------|---------------------------------------------------------------------------------------|------------------------------------------------------------------------------------------|--------------------|-----------------------------------------------------------------------------------------------------------------|------------------------------------------------------------------------------------------------------------------------------------------------------------|
|                         | <a href="#">Contraction Testing</a> |            |                |                                            |                                                                                       |                                                                                          |                    | Foot Dorsiflexion has poor reliability <sup>1</sup><br>Elbow Flexor is most reliable muscle group. <sup>2</sup> | <a href="#">2005</a><br><sup>3</sup> <a href="#">Iannaccone et al. 2003</a><br><a href="#">NIH NINDS CDE for SMA</a><br><a href="#">Kissel et al. 2014</a> |
| Pulmonary Function Test | Forced Vital Capacity               | 5+ years   | ~10 minutes    | Scored in Litres                           | Presently unavailable for SMA                                                         | <b>Criterion:</b><br>HFMSE - M-H (0.78-0.92) <sup>1</sup><br>EK2 – M (0.77) <sup>2</sup> | No                 |                                                                                                                 | <sup>1</sup> <a href="#">Glanzman et al. 2011</a><br><sup>2</sup> <a href="#">Steffensen et al. 2008</a><br><a href="#">Bertini et al. 2005</a>            |
| Pulmonary Function Test | Arterial Blood Gas Testing (ABG)    | Any        | <20 minutes    | % Saturation                               | Presently unavailable for SMA                                                         | Presently unavailable for SMA                                                            | No                 | Reliability & Validity Data unavailable in SMA.                                                                 | <a href="#">McKim et al. 2011</a>                                                                                                                          |
| Pulmonary Function Test | Peak Cough Flow                     | 5+ years   | Unknown        | Measured in Litres/Minute or Litres/Second | Presently unavailable for SMA                                                         | Presently unavailable for SMA                                                            | No                 | Reliability & Validity Data unavailable in SMA.                                                                 | <a href="#">Bertini et al. 2005</a><br><a href="#">McKim et al. 2011</a><br><a href="#">Suárez et al. 2002</a>                                             |
| Pulmonary Function Test | Maximum Expiratory Pressure (MEP)   | 5+ years   | As part of PFT | Measured in cmH <sub>2</sub> O             | Presently unavailable for SMA                                                         | Presently unavailable for SMA                                                            | No                 | Reliability & Validity Data unavailable in SMA.                                                                 | <a href="#">McKim et al. 2011</a>                                                                                                                          |

| <i>Type of Measure</i>        | <i>Outcome Measure</i>                               | <i>Age</i>                                         | <i>Timing</i>  | <i>Scoring Type</i>                               | <i>Reliability</i><br>H – High<br>(0.85+)<br>M – Moderate<br>(0.70-0.84)<br>L – Low<br>(<0.70)                                                                               | <i>Validity</i><br>H – High<br>(0.85+)<br>M – Moderate<br>(0.70-0.84)<br>L – Low<br>(<0.70)    | <i>Proprietary</i> | <i>Other</i>                                    | <i>References</i>                                                                                       |
|-------------------------------|------------------------------------------------------|----------------------------------------------------|----------------|---------------------------------------------------|------------------------------------------------------------------------------------------------------------------------------------------------------------------------------|------------------------------------------------------------------------------------------------|--------------------|-------------------------------------------------|---------------------------------------------------------------------------------------------------------|
| Pulmonary Function Test       | Maximum Inspiratory Pressure (MIP)                   | 5+ years                                           | As part of PFT | Measured in cmH <sub>2</sub> O                    | Presently unavailable for SMA                                                                                                                                                | Presently unavailable for SMA                                                                  | No                 | Reliability & Validity Data unavailable in SMA. | <a href="#">Bertini et al. 2005</a><br><a href="#">McKim et al. 2011</a>                                |
| Pulmonary Function Test       | Pressure at 100ms (P0.1)                             | 5+ years                                           | As part of PFT | Measured in cmH <sub>2</sub> O                    | Presently unavailable for SMA                                                                                                                                                | Presently unavailable for SMA                                                                  | No                 | Reliability & Validity Data unavailable in SMA. | <a href="#">Bertini et al. 2005</a>                                                                     |
| Quality of Life               | <a href="#">PedsQL / PedsQL Neuromuscular Module</a> | Children 5-18 years<br>Parent/Caregiver 2-18 years | ~5 minutes     | 25 item Questionnaire                             | <b>Child</b><br>Inter-rater: H <sup>2</sup><br>Internal: M<br>Test-Retest: H <sup>1,2</sup><br><b>Parent</b><br>Inter-rater: H <sup>1</sup><br>Test-Retest: H <sup>1,2</sup> | Presently unavailable for SMA                                                                  | Yes                |                                                 | <sup>1</sup> <a href="#">Iannaccone et al. 2009</a><br><sup>2</sup> <a href="#">Dunaway et al. 2010</a> |
| Quality of Life Questionnaire | <a href="#">Short Form 36 (SF-36)</a>                | ~15 years +                                        | 5-20 minutes   | Scores of 0-100 assessing varying aspects of QoL. | Inter-rater: M-H <sup>1*</sup><br>Internal: M <sup>1*</sup><br>Intra-rater: M-H <sup>1*</sup>                                                                                | <b>Criterion:</b><br>IADL – L (0.262) <sup>1*</sup>                                            | No                 | Reliability & Validity Data unavailable in SMA. | <sup>1</sup> <a href="#">SCIRE NIH NINDS CDE for SMA</a><br>*Not measured in SMA                        |
| Quality of Life Questionnaire | <a href="#">Sickness Impact Profile 68</a>           | Unknown                                            | 30 minutes     | Dichotomous Survey                                | Internal: H <sup>1*</sup>                                                                                                                                                    | <b>Criterion:</b><br>Barthel Index – M (0.74) <sup>1*</sup><br>LiSAT – L (-0.52) <sup>1*</sup> | Yes                | Reliability & Validity Data unavailable in SMA. | <sup>1</sup> <a href="#">SCIRE NIH NINDS CDE</a><br>*Not measured in SMA                                |

## References

- Andersen, L. K., Knak, K. L., Witting, N., & Vissing, J. (2016). Two- and 6-minute walk tests assess walking capability equally in neuromuscular diseases. *Neurology*, *86*(5), 442–445. <https://doi.org/10.1212/WNL.0000000000002332>
- Barr, A. E., Diamond, B. E., Wade, C. K., Harashima, T., Pecorella, W. A., Potts, C. C., ... McMahon, D. J. (1991). Reliability of testing measures in Duchenne or Becker muscular dystrophy. *Archives of Physical Medicine and Rehabilitation*, *72*(5), 315–319. <https://doi.org/10.5555/uri:pii:000399939190248H>
- Bérard, C., Fermanian, J., & Payan, C. (2008). Outcome measure for SMA II and III patients. *Neuromuscular Disorders*, *18*(7), 593–594. <https://doi.org/10.1016/j.nmd.2008.05.005>
- Bertini, E., Burghes, A., Bushby, K., Estournet-Mathiaud, B., Finkel, R. S., Hughes, R. A. C., ... Zerres, K. (2005). 134th ENMC International Workshop: Outcome Measures and Treatment of Spinal Muscular Atrophy 11–13 February 2005 Naarden, The Netherlands. *Neuromuscular Disorders*, *15*(11), 802–816. <https://doi.org/10.1016/j.nmd.2005.07.005>
- Box and Block Test (BBT). Retrieved June 21, 2019, from Spinal Cord Injury Research Evidence website: <https://scireproject.com/outcome-measures/outcome-measure-tool/box-and-block-test-bbt/>
- Cano, S. J., Mayhew, A., Glanzman, A. M., Krosschell, K. J., Swoboda, K. J., Main, M., ... Kissel, J. T. (2013). Rasch analysis of clinical outcome measures in spinal muscular atrophy. *Muscle & Nerve*, *49*(3), 422–430. <https://doi.org/10.1002/mus.23937>

- Dunaway, S., Montes, J., Garber, C. E., Carr, B., Kramer, S. S., Kamil-Rosenberg, S., ... Vivo, D. C. D. (2014). Performance of the timed “up & go” test in spinal muscular atrophy. *Muscle & Nerve*, *50*(2), 273–277. <https://doi.org/10.1002/mus.24153>
- Dunaway, S., Montes, J., Montgomery, M., Battista, V., Koo, B., Marra, J., ... Kaufmann, P. (2010). Reliability of telephone administration of the PedsQL™ Generic Quality of Life Inventory™ and Neuromuscular Module™ in spinal muscular atrophy (SMA). *Neuromuscular Disorders*, *20*(3), 162–165. <https://doi.org/10.1016/j.nmd.2009.12.002>
- Glanzman, A. M., O’Hagen, J. M., McDermott, M. P., Martens, W. B., Flickinger, J., Riley, S., ... Finkel, R. S. (2011). Validation of the Expanded Hammersmith Functional Motor Scale in Spinal Muscular Atrophy Type II and III. *Journal of Child Neurology*, *26*(12), 1499–1507. <https://doi.org/10.1177/0883073811420294>
- Hashizume, A., Katsuno, M., Suzuki, K., Banno, H., Suga, N., Mano, T., ... Sobue, G. (2015). A functional scale for spinal and bulbar muscular atrophy: Cross-sectional and longitudinal study. *Neuromuscular Disorders: NMD*, *25*(7), 554–562. <https://doi.org/10.1016/j.nmd.2015.03.008>
- Iannaccone, S. T. (2002). Outcome Measures for Pediatric Spinal Muscular Atrophy. *Archives of Neurology*, *59*(9), 1445–1450. <https://doi.org/10.1001/archneur.59.9.1445>
- Iannaccone, S. T., & Hyman, L. S. (2003). Reliability of 4 Outcome Measures in Pediatric Spinal Muscular Atrophy. *Archives of Neurology*, *60*(8), 1130–1136. <https://doi.org/10.1001/archneur.60.8.1130>
- Jebsen Hand Function Test. Retrieved June 21, 2019, from Shirley Ryan AbilityLab - Formerly RIC website: <https://www.sralab.org/rehabilitation-measures/jebsen-hand-function-test>

Jebsen Hand Function Test (JHFT). Retrieved June 21, 2019, from Spinal Cord Injury Research Evidence website:

<https://scireproject.com/outcome-measures/outcome-measure-tool/jebsen-hand-function-test-jhft/>

- Kissel, J. T., Elsheikh, B., King, W. M., Freimer, M., Scott, C. B., Kolb, S. J., ... Project Cure Spinal Muscular Atrophy Investigators Network. (2014). SMA valiant trial: a prospective, double-blind, placebo-controlled trial of valproic acid in ambulatory adults with spinal muscular atrophy. *Muscle & Nerve*, *49*(2), 187–192. <https://doi.org/10.1002/mus.23904>
- Lewelt, A., Krosschell, K. J., Scott, C., Sakonju, A., Kissel, J. T., Crawford, T. O., ... Swoboda, K. J. (2010). Compound muscle action potential and motor function in children with spinal muscular atrophy. *Muscle & Nerve*, *42*(5), 703–708. <https://doi.org/10.1002/mus.21838>
- Lue, Y.-J., Lin, R.-F., Chen, S.-S., & Lu, Y.-M. (2009). Measurement of the Functional Status of Patients with Different Types of Muscular Dystrophy. *The Kaohsiung Journal of Medical Sciences*, *25*(6), 325–333. [https://doi.org/10.1016/S1607-551X\(09\)70523-6](https://doi.org/10.1016/S1607-551X(09)70523-6)
- Mazzone, E., Bianco, F., Martinelli, D., Glanzman, A. M., Messina, S., Sanctis, R. D., ... Mercuri, E. (2011). Assessing upper limb function in nonambulant SMA patients: Development of a new module. *Neuromuscular Disorders*, *21*(6), 406–412. <https://doi.org/10.1016/j.nmd.2011.02.014>
- Mazzone, E. S., Messina, S., Vasco, G., Main, M., Eagle, M., D'Amico, A., ... Mercuri, E. (2009). Reliability of the North Star Ambulatory Assessment in a multicentric setting. *Neuromuscular Disorders*, *19*(7), 458–461. <https://doi.org/10.1016/j.nmd.2009.06.368>
- Mazzone, Elena S., Mayhew, A., Montes, J., Ramsey, D., Fanelli, L., Young, S. D., ... Mercuri, E. (2017). Revised upper limb module for spinal muscular atrophy: Development of a new module. *Muscle & Nerve*, *55*(6), 869–874. <https://doi.org/10.1002/mus.25430>

- McKim, D. A., Road, J., Avendano, M., Abdool, S., Côté, F., Duguid, N., ... Canadian Thoracic Society Home Mechanical Ventilation Committee. (2011). Home Mechanical Ventilation: A Canadian Thoracic Society Clinical Practice Guideline. *Canadian Respiratory Journal*, 18(4), 197–215. <https://doi.org/10.1155/2011/139769>
- Mercuri, E., Darras, B. T., Chiriboga, C. A., Day, J. W., Campbell, C., Connolly, A. M., ... Finkel, R. S. (2018). Nusinersen versus Sham Control in Later-Onset Spinal Muscular Atrophy. *The New England Journal of Medicine; Boston*, 378(7), 625–635. <http://dx.doi.org.ezproxy.library.dal.ca/10.1056/NEJMoa1710504>
- Merlini, L., Bertini, E., Minetti, C., Mongini, T., Morandi, L., Angelini, C., & Vita, G. (2004). Motor function-muscle strength relationship in spinal muscular atrophy. *Muscle & Nerve*, 29(4), 548–552. <https://doi.org/10.1002/mus.20018>
- Merlini, L., Mazzone, E. S., Solari, A., & Morandi, L. (2002). Reliability of hand-held dynamometry in spinal muscular atrophy. *Muscle & Nerve*, 26(1), 64–70. <https://doi.org/10.1002/mus.10166>
- Montes, J., McDermott, M. P., Martens, W. B., Dunaway, S., Glanzman, A. M., Riley, S., ... Finkel, R. S. (2010). *Six-Minute Walk Test demonstrates motor fatigue in spinal muscular atrophy*. 6.
- Montes, Jacqueline, Gordon, A. M., Pandya, S., De Vivo, D. C., & Kaufmann, P. (2009). Clinical Outcome Measures in Spinal Muscular Atrophy. *Journal of Child Neurology*, 24(8), 968–978. <https://doi.org/10.1177/0883073809332702>
- Nelson, L., Owens, H., Hynan, L. S., Iannaccone, S. T., & AmSMART Group. (2006). The gross motor function measure™ is a valid and sensitive outcome measure for spinal muscular atrophy. *Neuromuscular Disorders*, 16(6), 374–380. <https://doi.org/10.1016/j.nmd.2006.03.005>

- O'Hagen, J. M., Glanzman, A. M., McDermott, M. P., Ryan, P. A., Flickinger, J., Quigley, J., ... De Vivo, D. C. (2007). An expanded version of the Hammersmith Functional Motor Scale for SMA II and III patients. *Neuromuscular Disorders*, *17*(9), 693–697.  
<https://doi.org/10.1016/j.nmd.2007.05.009>
- Pera, M. C., Coratti, G., Forcina, N., Mazzone, E. S., Scoto, M., Montes, J., ... Mercuri, E. (2017). Content validity and clinical meaningfulness of the HFMSE in spinal muscular atrophy. *BMC Neurology*, *17*(1), 39. <https://doi.org/10.1186/s12883-017-0790-9>
- Purdue Pegboard Test. Retrieved June 21, 2019, from Shirley Ryan AbilityLab - Formerly RIC website: <https://www.sralab.org/rehabilitation-measures/purdue-pegboard-test>
- Ramsey, D., Scoto, M., Mayhew, A., Main, M., Mazzone, E. S., Montes, J., ... Muntoni, F. (2017). Revised Hammersmith Scale for spinal muscular atrophy: A SMA specific clinical outcome assessment tool. *PLoS ONE*, *12*(2). <https://doi.org/10.1371/journal.pone.0172346>
- Ruiz-Cortes, X., Ortiz-Corredor, F., & Mendoza-Pulido, C. (2017). Reliability of home-based, motor function measure in hereditary neuromuscular diseases. *The Journal of International Medical Research*, *45*(1), 261–271. <https://doi.org/10.1177/0300060516674608>
- Russell, D. J., Rosenbaum, P. L., Cadman, D. T., Gowland, C., Hardy, S., & Jarvis, S. (1989). The Gross Motor Function Measure: A Means to Evaluate the Effects of Physical Therapy. *Developmental Medicine & Child Neurology*, *31*(3), 341–352. <https://doi.org/10.1111/j.1469-8749.1989.tb04003.x>
- Short Form 36 (SF-36). Retrieved June 21, 2019, from Spinal Cord Injury Research Evidence website: <https://scireproject.com/outcome-measures/outcome-measure-tool/short-form-36-sf-36/>
- Sickness Impact Profile 68 (SIP 68). Retrieved June 21, 2019, from Spinal Cord Injury Research Evidence website: <https://scireproject.com/outcome-measures/outcome-measure-tool/sickness-impact-profile-68-sip-68/>

- Steffensen, B., Hyde, S., Lyager, S., & Mattsson, E. (2001). Validity of the EK scale: A functional assessment of non-ambulatory individuals with Duchenne muscular dystrophy or spinal muscular atrophy. *Physiotherapy Research International; London*, 6(3), 119.
- Steffensen, B.F., Mayhew, A., Aloysius, A., Eagle, M., Mercuri, E., Messina, S., ... Muntoni, F. (2008). T.P.1.07 Egen classification revisited in SMA. *Neuromuscular Disorders*, 18(9–10), 740–741. <https://doi.org/10.1016/j.nmd.2008.06.059>
- Steffensen, Birgit F., Lyager, S., Werge, B., Rahbek, J., & Mattsson, E. (2002). Physical capacity in non-ambulatory people with Duchenne muscular dystrophy or spinal muscular atrophy: a longitudinal study. *Developmental Medicine & Child Neurology*, 44(9), 623–632. <https://doi.org/10.1111/j.1469-8749.2002.tb00847.x>
- Suárez, A. A., Pessolano, F. A., Monteiro, S. G., Ferreyra, G., Capria, M. E., Mesa, L., ... De Vito, E. L. (2002). Peak flow and peak cough flow in the evaluation of expiratory muscle weakness and bulbar impairment in patients with neuromuscular disease. *American Journal of Physical Medicine & Rehabilitation*, 81(7), 506–511.
- Takeuchi, Y., Katsuno, M., Banno, H., Suzuki, K., Kawashima, M., Atsuta, N., ... Sobue, G. (2008). Walking capacity evaluated by the 6-minute walk test in spinal and bulbar muscular atrophy. *Muscle & Nerve*, 38(2), 964–971. <https://doi.org/10.1002/mus.21077>
- Vuillerot, C., Payan, C., Iwaz, J., Ecochard, R., & Bérard, C. (2013). Responsiveness of the Motor Function Measure in Patients With Spinal Muscular Atrophy. *Archives of Physical Medicine and Rehabilitation*, 94(8), 1555–1561. <https://doi.org/10.1016/j.apmr.2013.01.014>
- Werlauff, U., & Steffensen, B. F. (2014). The applicability of four clinical methods to evaluate arm and hand function in all stages of spinal muscular atrophy type II. *Disability and Rehabilitation*, 36(25), 2120–2126. <https://doi.org/10.3109/09638288.2014.892157>



- Young, C. A., Ealing, J., McDermott, C., Williams, T., Al-Chalabi, A., Majeed, T., ... Tennant, A. (2019). The relationships between symptoms, disability, perceived health and quality of life in amyotrophic lateral sclerosis/motor neuron disease. *Amyotrophic Lateral Sclerosis & Frontotemporal Degeneration*, 1–11. <https://doi.org/10.1080/21678421.2019.1615951>
- Young, S. D., Montes, J., Kramer, S. S., Marra, J., Salazar, R., Cruz, R., ... Vivo, D. C. D. (2016). Six-minute walk test is reliable and valid in spinal muscular atrophy. *Muscle & Nerve*, 54(5), 836–842. <https://doi.org/10.1002/mus.25120>
